# Supplementary material for: Exendin-4 Exhibits Enhanced Anti-tumor Effects in Diabetic Mice
Source: PubMed Central journal article supplement (PMC5431757; doi:10.1038/s41598-017-01952-5), 2017-05-11
Supplement: 41598_2017_1952_MOESM1_ESM.pdf [file 41598_2017_1952_MOESM1_ESM.pdf]

# **Exendin-4 Exhibits Enhanced Anti-tumor Effects in Diabetic Mice**

Lan He<sup>1,2,3</sup>, Priscilla TY Law<sup>1</sup>, Chun Kwok Wong<sup>4,5</sup>, Juliana CN Chan<sup>2,3,6</sup>, Paul KS Chan<sup>1</sup>

<sup>1</sup>Department of Microbiology, <sup>2</sup>Department of Medicine and Therapeutics, <sup>3</sup>Li Ka Shing Institute of Health Sciences, <sup>4</sup>Department of Chemical Pathology, <sup>5</sup>Institute of Chinese Medicine and State Key Laboratory of Phytochemistry and Plant Resources in West China, The Chinese University of Hong Kong, Hong Kong, <sup>6</sup>Hong Kong Institute of Diabetes and Obesity, The Chinese University of Hong Kong, Prince of Wales Hospital, Shatin, NT Hong Kong

## **Corresponding to:**

Professor Paul KS Chan  
Telephone: (852) 2632 3339  
Fax: (852) 2632 3426  
Email: paulkschan@cuhk.edu.hk  
Department of Microbiology,  
The Chinese University of Hong Kong  
Prince of Wales Hospital, Shatin, Hong Kong

**Running title:** anti-tumor effect of exendin-4

**Keywords:** Anti-tumor immune response; CD8+ cytotoxic T cells; T regulatory cells, Diabetes, Tumor, Human papilloma virus (HPV)

## Supporting Information

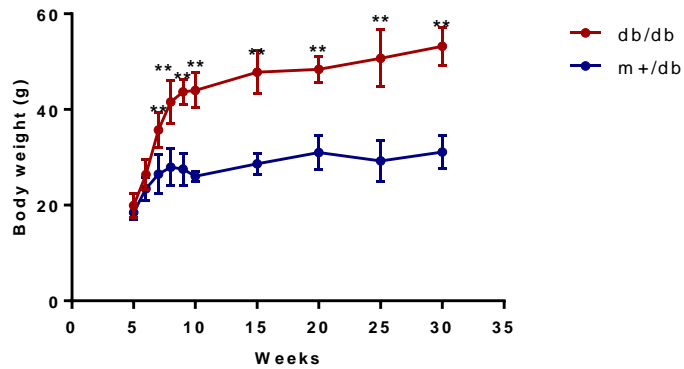

**Figure S1. Change in body weight with age in db/db and m+/db (control) mice.** Body weight of db/db and non-diabetic littermates (m+/db) was measured weekly from 5 to 30 weeks of age (n=10). Each point represents means  $\pm$  S.D. \*\* p < 0.001, diabetic group compared with control group.

**A. Fasting serum glucose concentration of db/db and m+/db mice**

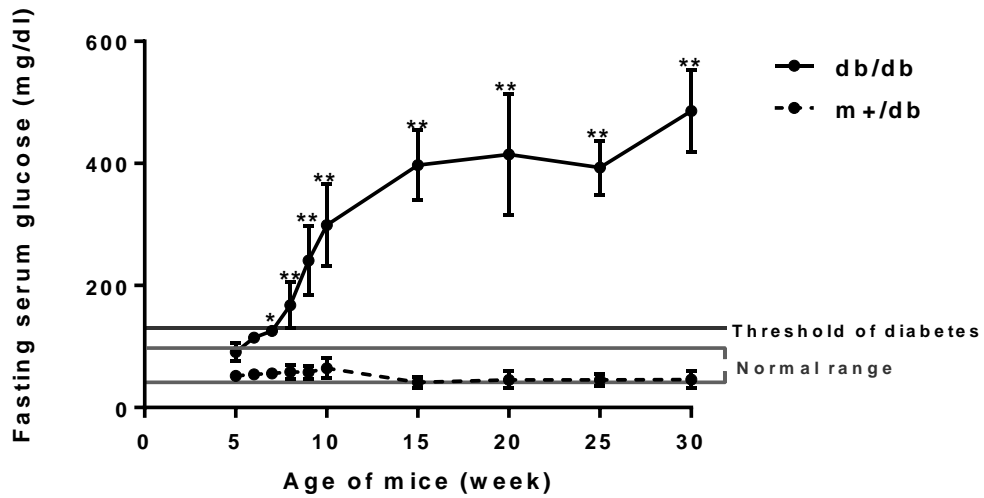

**B. Serum glucose concentration at 2 hours during OGTT of db/db and m+/db mice**

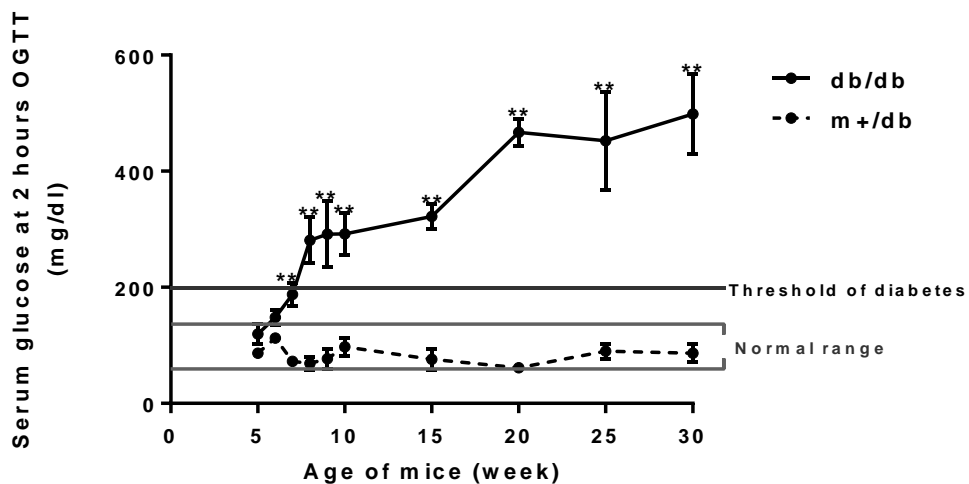

**Figure S2. Change in blood glucose level with age in db/db and m+/db mice.** Oral glucose tolerance test (OGTT) was performed weekly in db/db and m+/db mice from 5 to 30 weeks of age (n=10). Serum glucose concentration was measured using Autokit Glucose (Wako, Japan). (A) Fasting serum glucose concentration and (B) Serum glucose concentration at 2 hours during OGTT of db/db and m+/db mice are shown. The solid line indicates the threshold for diagnosis of diabetes. Each point represents mean  $\pm$  S.E.M. \* P < 0.05, \*\* P < 0.001, db/db compared with m+/db mice

**A**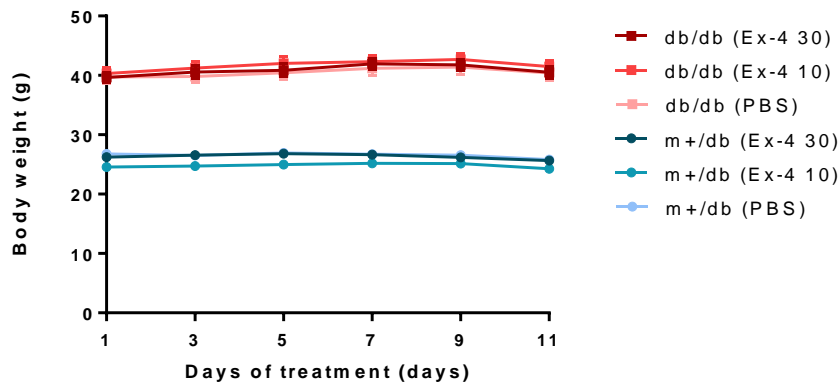**B**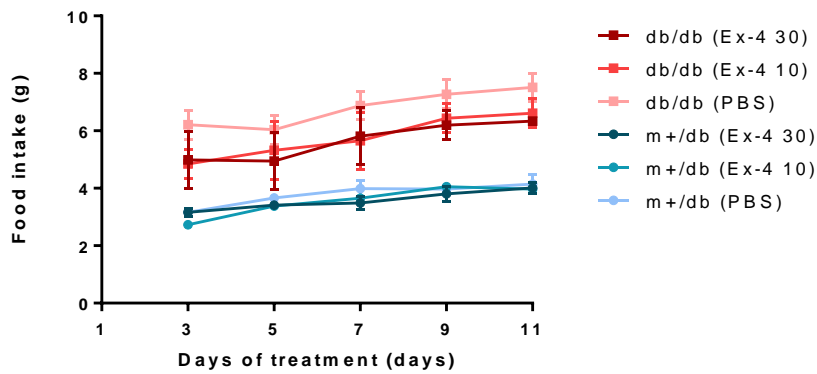

**Figure S3. Body weight and daily food consumption in CUP-1 subcutaneous allograft db/db and m+/db mice injection with exendin-4 or PBS (control).** Male db/db and db/m+ mice inoculated with  $2 \times 10^7$  CUP-1 cells were injected with exendin-4 intraperitoneally (10 or 30 nM/kg body weight) or PBS daily for 13 days. (A) Body weight and (B) daily food consumption were measured every other day in the db/db and m+/db mice ( $n = 10$ ). Data are expressed as mean  $\pm$  S.E.M. Ex4 30 indicates the mice treated with 30 nM/kg body weight Exendin-4; Ex4 10 indicates the mice treated with 10 nM/kg body weight Exendin-4.

| Parameter                            | db/db      |                |                | db/m+       |             |             |
|--------------------------------------|------------|----------------|----------------|-------------|-------------|-------------|
|                                      | PBS        | Ex-4 10        | Ex-4 30        | PBS         | Ex-4 10     | Ex-4 30     |
| Fasting insulin (ng/ml) <sup>a</sup> | 1.7 ± 0.6  | 2.5 ± 0.6*     | 2.6 ± 0.6*     | 0.3 ± 0.1   | 0.3 ± 0.1   | 0.2 ± 0.1   |
| HOMA-IR <sup>b</sup>                 | 18.3 ± 0.5 | 12.1 ± 1.3**   | 8.5 ± 1.3**    | 0.9 ± 0.2   | 1.2 ± 0.3   | 0.7 ± 0.1   |
| HOMA-IS <sup>b</sup>                 | 65.5 ± 8.2 | 113.4 ± 69.7** | 127.1 ± 50.4** | 26.8 ± 9.96 | 28.5 ± 2.38 | 20.4 ± 3.36 |

**Table S1 Fasting serum insulin, HOMA-IR and HOMA-IS of db/db and m+/db mice in 13-day exendin-4 treatment**

Ex-4 10 and Ex-4 30 represent mice treated with 10 and 30 nM/kg exendin-4, respectively. PBS indicates the mice injected with PBS as control. Data are expressed as mean ± S.E.M. \* P < 0.05, \*\* P < 0.001, compared with PBS in the corresponding db/db or m+/db group.

<sup>a</sup> Fasting serum insulin level was measured at day 13 of exendin-4 treatment using insulin ELISA Kit (Millipore, USA).

<sup>b</sup> Homeostasis model assessment of insulin resistance (HOMA-IR) and insulin secretion (HOMA-IS) were calculated to measure insulin resistance and insulin secretion, respectively.
